# Supplementary material
Source: PubMed Central journal article supplement (PMC7171574)
Supplement: jamaneurol-77-872-s001.pdf [file jamaneurol-77-872-s001.pdf]

## Supplementary Online Content

Inoue M, Tanboon J, Hirakawa S, et al. Association of dermatomyositis sine dermatitis with anti-nuclear matrix protein 2 autoantibodies. *JAMA Neurol*. Published online April 20, 2020. doi:10.1001/jamaneurol.2020.0673.

**eTable 1.** Autoantibodies used for immunohistochemistry

**eTable 2.** Factors associated with dermatomyositis sine dermatitis in patients with dermatomyositis on logistic regression analysis (adermopathic period > 2 years)

**eTable 3.** Factors associated with dermatomyositis sine dermatitis in patients with dermatomyositis on logistic regression analysis (for dermatomyositis sine dermatitis without a rash throughout available follow-up period)

**eTable 4.** Factors associated with dermatomyositis sine dermatitis in patients with dermatomyositis on logistic regression analysis (with perifascicular atrophy)

**eTable 5.** Factors associated with dermatomyositis sine dermatitis in patients with dermatomyositis on logistic regression analysis (with MAC deposition on capillaries)

This supplementary material has been provided by the authors to give readers additional information about their work.

**eTable 1. Autoantibodies used for immunohistochemistry**

| <b>Antibody</b>                                          | <b>Clone</b> | <b>Dilution</b> | <b>Company</b>           |
|----------------------------------------------------------|--------------|-----------------|--------------------------|
| Human major histocompatibility complex class I (HLA-ABC) | W6/32        | 1:10,000        | Thermo Fisher Scientific |
| Human major histocompatibility complex class II (HLA-DR) | B308         | 1:500           | Affinity BioReagents     |
| Membrane attack complex (C5b-9)                          | aE11         | 1:100           | Dako                     |
| Myxovirus resistance protein A (Mx1/2/3)                 | H-285        | 1:200           | Santa Cruz Biotechnology |

HLA: human leukocyte antigen

**eTable 2. Factors associated with dermatomyositis sine dermatitis in patients with dermatomyositis on logistic regression analysis (adermopathic period > 2 years)**

Each category of disease duration denotes the following period: short ( $\leq 25^{\text{th}}$  percentile,  $\leq 1.5$  months), middle ( $> 25^{\text{th}}$  and  $\leq 75^{\text{th}}$  percentile,  $> 1.5$  months and  $\leq 6.5$  months), and long ( $> 75^{\text{th}}$  percentile,  $> 6.5$  months). OR, odds ratio; CI, confidence interval; NXP-2, nuclear matrix protein 2; TIF1- $\gamma$ , transcription intermediary factor 1  $\gamma$

|                                                                   | Unadjusted (n = 179) |         |
|-------------------------------------------------------------------|----------------------|---------|
|                                                                   | OR (95%CI)           | p value |
| NXP-2                                                             | 20.33 (2.48-166.96)  | .005    |
| TIF1- $\gamma$                                                    | 0.21 (0.03-1.69)     | .14     |
| Disease duration:                                                 | 1.00 [reference]     |         |
| Short ( $\leq 25^{\text{th}}$ percentile)                         |                      |         |
| Middle ( $> 25^{\text{th}}$ and $\leq 75^{\text{th}}$ percentile) | 4.76 (0.57-39.86)    | .15     |
| Long ( $> 75^{\text{th}}$ percentile)                             | 1.16 (0.07-19.08)    | .92     |

confidence interval; NXP-2, nuclear matrix protein 2; TIF1- $\gamma$ , transcription intermediary factor 1  $\gamma$

**eTable 3. Factors associated with dermatomyositis sine dermatitis in patients with dermatomyositis on logistic regression analysis (for dermatomyositis sine dermatitis without a rash throughout available)**

|                                                               | Unadjusted (n = 182) |         | Adjusted (n = 182) <sup>a</sup> |         |
|---------------------------------------------------------------|----------------------|---------|---------------------------------|---------|
|                                                               | OR (95%CI)           | p value | OR (95%CI)                      | p value |
| <b>NXP-2</b>                                                  |                      |         |                                 |         |
| Age                                                           | 1.01 (0.98-1.03)     | .66     | 1.04 (1.00-1.08)                | .05     |
| Female                                                        | 1.47 (0.40-5.38)     | .56     | 0.57 (0.06-5.18)                | .62     |
| Disease duration:                                             | 1.00 [reference]     |         | 1.00 [reference]                |         |
| Short (≤ 25 <sup>th</sup> percentile)                         |                      |         |                                 |         |
| Middle (> 25 <sup>th</sup> and ≤ 75 <sup>th</sup> percentile) | 1.07 (0.27-3.75)     | .99     | 0.46 (0.05-4.43)                | .50     |
| Long (> 75 <sup>th</sup> percentile)                          | 0.00 (0.00-infinity) | .99     | 0.00 (0.00-infinity)            | .99     |
| Perifascicular atrophy                                        | 5.17 (1.07-25.08)    | .04     | 38.93 (3.49-434.42)             | .003    |
| NXP-2                                                         | 21.96 (2.71-177.90)  | .004    | 187.16 (8.80-3982.94)           | .001    |
| <b>TIF1-γ</b>                                                 |                      |         |                                 |         |
| Age                                                           | 1.01 (0.98-1.03)     | .66     | 1.01 (0.98-1.04)                | .56     |
| Female                                                        | 1.47 (0.40-5.38)     | .56     | 1.59 (0.34-7.53)                | .56     |
| Disease duration:                                             | 1.00 [reference]     |         | 1.00 [reference]                |         |
| Short (≤ 25 <sup>th</sup> percentile)                         |                      |         |                                 |         |
| Middle (25 <sup>th</sup> and 75 <sup>th</sup> percentile)     | 1.07 (0.27-3.75)     | .99     | 0.29 (0.05-1.67)                | .17     |
| Long (> 75 <sup>th</sup> percentile)                          | 0.00 (0.00-infinity) | .99     | 0.00 (0.00-infinity)            | .99     |
| Perifascicular atrophy                                        | 5.17 (1.07-25.08)    | .04     | 16.09 (2.35-110.38)             | .005    |
| TIF1-γ                                                        | 0.19 (0.02-1.51)     | .12     | 0.11 (0.01-1.10)                | .06     |

**follow-up period)**

<sup>a</sup> Adjusted for autoantibodies (NXP-2 or TIF1-γ) and disease duration. Each category of the disease duration includes the following period: short (≤ 25<sup>th</sup> percentile, ≤ 1.5 months), middle (> 25<sup>th</sup> and ≤ 75<sup>th</sup> percentile, > 1.5 months and ≤ 6 months), and long (> 75<sup>th</sup> percentile, > 6 months). OR, odds ratio; CI, confidence interval; NXP-2, nuclear matrix protein 2; TIF1-γ, transcription intermediary factor 1 γ

**eTable 4.** Factors associated with **dermatomyositis sine dermatitis** in patients with dermatomyositis on logistic regression analysis (with perifascicular atrophy)

|                                                                       | Unadjusted (n = 84) |         | Adjusted (n = 84) <sup>a</sup> |         |
|-----------------------------------------------------------------------|---------------------|---------|--------------------------------|---------|
|                                                                       | OR (95%CI)          | p value | OR (95%CI)                     | p value |
| <b>NXP-2</b>                                                          |                     |         |                                |         |
| Age                                                                   | 1.01 (0.98-1.03)    | .65     | 1.04 (1.00-1.08)               | .07     |
| Female                                                                | 0.90 (0.24-3.36)    | .87     | 0.24 (0.03-1.92)               | .18     |
| Disease duration:<br>Short ( $\leq$ 25 <sup>th</sup> percentile)      | 1.00 [reference]    |         | 1.00 [reference]               |         |
| Middle ( $>$ 25 <sup>th</sup> and $\leq$ 75 <sup>th</sup> percentile) | 0.29 (0.06-1.50)    | .14     | 0.47 (0.06-3.54)               | .47     |
| Long ( $>$ 75 <sup>th</sup> percentile)                               | 0.22 (0.03-1.96)    | .18     | 0.07 (0.00-1.22)               | .07     |
| <b>NXP-2</b>                                                          | 20.67 (3.90-109.59) | .004    | 115.83 (7.32-1831.99)          | .001    |
| <b>TIF1-<math>\gamma</math></b>                                       |                     |         |                                |         |
| Age                                                                   | 1.01 (0.98-1.03)    | .66     | 1.01 (0.99-1.04)               | .32     |
| Female                                                                | 0.90 (0.24-3.36)    | .87     | 0.67 (0.15-2.92)               | .59     |
| Disease duration:<br>Short ( $\leq$ 25 <sup>th</sup> percentile)      | 1.00 [reference]    |         | 1.00 [reference]               |         |
| Middle ( $>$ 25 <sup>th</sup> and $\leq$ 75 <sup>th</sup> percentile) | 0.29 (0.06-1.50)    | .14     | 0.32 (0.06-1.80)               | .20     |
| Long ( $>$ 75 <sup>th</sup> percentile)                               | 0.22 (0.03-1.96)    | .18     | 0.20 (0.02-1.84)               | .15     |
| <b>TIF1-<math>\gamma</math></b>                                       | 0.13 (0.02-1.09)    | .06     | 0.09 (0.01-0.83)               | .03     |

<sup>a</sup>Adjusted for autoantibodies (NXP-2 or TIF1- $\gamma$ ) and disease duration. Each category of disease duration includes the following period: short ( $\leq$  25<sup>th</sup> percentile,  $\leq$  3 months), middle ( $>$  25<sup>th</sup> and  $\leq$  75<sup>th</sup> percentile,  $>$  3 months and  $\leq$  9 months), and long ( $>$  75<sup>th</sup> percentile,  $>$  9 months). OR, odds ratio; CI, confidence interval; NXP-2, nuclear matrix protein 2; TIF1- $\gamma$ , transcription intermediary factor 1  $\gamma$ .

**eTable 5. Factors associated with dermatomyositis sine dermatitis in patients with dermatomyositis on logistic regression analysis (with MAC deposition on capillaries)**

|                                                                    | Unadjusted (n = 165) |         | Adjusted (n = 165) <sup>a</sup> |         |
|--------------------------------------------------------------------|----------------------|---------|---------------------------------|---------|
|                                                                    | OR (95%CI)           | p value | OR (95%CI)                      | p value |
| <b>NXP-2</b>                                                       |                      |         |                                 |         |
| Age                                                                | 1.01 (0.98-1.03)     | .65     | 1.05 (1.01-1.09)                | .02     |
| Female                                                             | 1.56 (0.49-4.98)     | .45     | 0.58 (0.10-3.41)                | .55     |
| Disease duration:                                                  | 1.00 [reference]     |         | 1.00 [reference]                |         |
| Short ( $\leq$ 25 <sup>th</sup> percentile)                        |                      |         |                                 |         |
| Middle (> 25 <sup>th</sup> and $\leq$ 75 <sup>th</sup> percentile) | 1.02 (0.31-3.40)     | .98     | 0.93 (0.14-6.00)                | .94     |
| Long (> 75 <sup>th</sup> percentile)                               | 0.25 (0.03-2.26)     | .22     | 0.04 (0.00-0.95)                | .05     |
| Perifascicular atrophy                                             | 3.18 (0.94-10.78)    | .06     | 20.12 (2.54-159.28)             | .004    |
| NXP-2                                                              | 27.65 (3.49-218.95)  | .002    | 342.12 (15.23-7685.87)          | <.001   |
| <b>TIF1-<math>\gamma</math></b>                                    |                      |         |                                 |         |
| Age                                                                | 1.01 (0.98-1.03)     | .65     | 1.01 (0.99-1.04)                | .36     |
| Female                                                             | 1.56 (0.49-4.98)     | .45     | 1.51 (0.37-6.26)                | .57     |
| Disease duration:                                                  | 1.00 [reference]     |         | 1.00 [reference]                |         |
| Short ( $\leq$ 25 <sup>th</sup> percentile)                        |                      |         |                                 |         |
| Middle (25 <sup>th</sup> and 75 <sup>th</sup> percentile)          | 1.02 (0.31-3.40)     | .98     | 0.38 (0.07-1.96)                | .25     |
| Long (> 75 <sup>th</sup> percentile)                               | 0.25 (0.03-2.26)     | .22     | 0.08 (0.01-1.01)                | .05     |
| Perifascicular atrophy                                             | 3.18 (0.94-10.78)    | .06     | 8.33 (1.70-40.90)               | .009    |
| TIF1- $\gamma$                                                     | 0.12 (0.02-0.95)     | .05     | 0.07 (0.01-0.68)                | .02     |

<sup>a</sup>Adjusted for autoantibodies (NXP-2 or TIF1- $\gamma$ ) and disease duration. Each category of disease duration includes the following period: short ( $\leq$  25<sup>th</sup> percentile,  $\leq$  1.5 months), middle (> 25<sup>th</sup> and  $\leq$  75<sup>th</sup> percentile, > 1.5 months and  $\leq$  6 months), and long (> 75<sup>th</sup> percentile, > 6 months). MAC, membrane attack complex; OR, odds ratio; CI, confidence interval; NXP-2, nuclear matrix protein 2; TIF1- $\gamma$ , transcription intermediary factor 1  $\gamma$
